# Supplementary material for: Clinical Post-SARS-CoV-2 Infection Scenarios in Vaccinated and Non-Vaccinated Cancer Patients in Three German Cancer Centers: A Retrospective Analysis
Source: MDPI journal article supplement (doi:10.3390/cancers14153746), 2022-07-31
Supplement: s1 [file s1]

**Supplemental Table S1: Vaccination status of the 133 cancer patients of this study before acquiring a SARS-CoV-2 infection.**

| <b>COVID-19 vaccination status</b>                                       |               |       |
|--------------------------------------------------------------------------|---------------|-------|
| <b>Vaccinated patients (<i>n</i> and %)</b>                              | 49/133        | 37%   |
| <b>Data of the vaccinated patients</b>                                   | <i>n</i> = 49 | 100%  |
| <b>Type of first vaccination</b>                                         |               |       |
| Vaxzevria AZD1222                                                        | 4             | 8%    |
| Comirnaty BNT162b2                                                       | 36            | 72%   |
| Spikevax mRNA-1273                                                       | 2             | 4%    |
| Johnson and Johnson Ad26.COV2.S                                          | 2             | 4%    |
| Missing                                                                  | 5             | 5%    |
| <b>Type of second vaccination</b>                                        | 48/49         |       |
| Vaxzevria AZD1222                                                        | 1             | 2%    |
| Comirnaty BNT162b2 or Spikevax mRNA-1273                                 | 3             | 6%    |
| Comirnaty BNT162b2                                                       | 38            | 79%   |
| Missing                                                                  | 6             | 13%   |
| <b>Summary of COVID-19 vaccines among double vaccinated patients</b>     | 48/49         | 98%   |
| Vector based vaccine followed by mRNA                                    | 4             | 8%    |
| Vector based only                                                        | 1             | 2%    |
| mRNA based only                                                          | 37            | 77%   |
| Missing                                                                  | 6             | 13%   |
| Third vaccination (mRNA based only)                                      | 17/49         | 35%   |
| Median time from vaccination until SARS-CoV-19 infection in days (range) | 129           | 2-268 |
